# Supplementary material
Source: ML conference proceedings conference paper supplement (https://openaccess.thecvf.com/content/cvpr_2016/html/Savinov_Semantic_3D_Reconstruction_2016_CVPR_paper.html)
Supplement: Supplementary file 1 [file Savinov_Semantic_3D_Reconstruction_2016_CVPR_supplemental.zip]

Archive with 2 entries (2 files):
- 0466-supp.pdf
- ray_cvpr2016.mp4
